# Supplementary material
Source: PubMed Central journal article supplement (PMC8459767)
Supplement: jb.00276-21-s0003.pdf [file jb.00276-21-s0003.pdf]

The polar flagellar transcriptional regulatory network in *Vibrio campbellii* deviates from canonical *Vibrio* species

Blake D. Petersen, Michael S. Liu, Ram Podicheti, Albert Ying-Po Yang, Chelsea Simpson, Chris Hemmerich, Douglas B. Rusch, Julia C. van Kessel

Supplemental Figures S1-S3  
Supplemental Tables S1-S3  
Supplemental Datasets S1-S3

**Dataset S1:**

RNA-seq differential expression analysis from experiments comparing *V. campbellii* DS40M4 strains wild-type,  $\Delta rpoN$ ,  $\Delta flrA$ ,  $\Delta flrC$ , and  $\Delta fliA$  strains. NCBI GEO accession: GSE167483

**Dataset S2:**

Transcriptional start site analysis of data from differential RNA-seq experiments performed with *V. campbellii* DS40M4 wild-type and  $\Delta luxR$  strains. NCBI GEO accession: GSE147616

**Dataset S3:**

qRT-PCR raw data analyzing expression of flagellar genes (*flhF*, *flgO*, *fliK*, *flaA*, *hfq*). Calculations for standard curves and normalization to *hfq* (endogenous control gene) are included. Experiments were performed with five biological replicates and two technical replicates.

Region 1

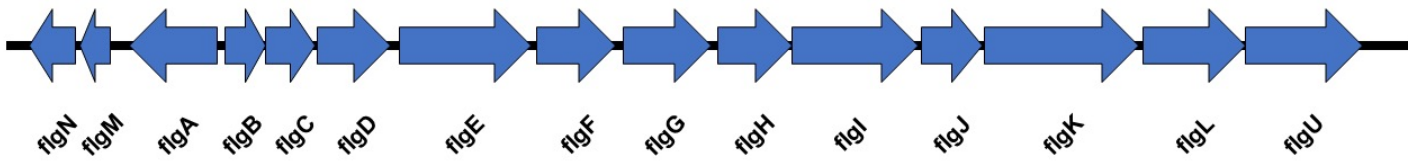

Region 2

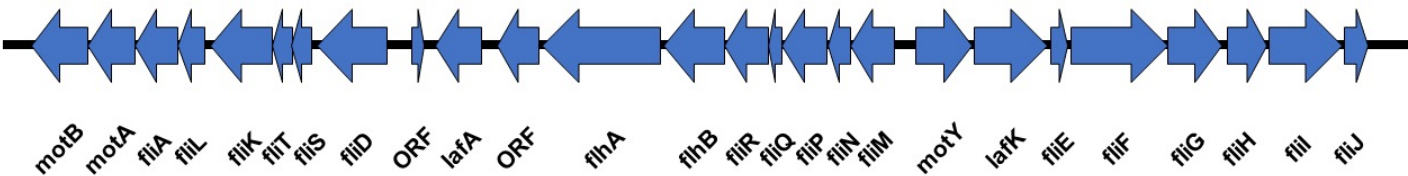

**Supplemental Fig. 1: Organization of the lateral flagellar gene system in *V. campbellii* DS40M4**

A) Diagram showing the two regions of lateral flagellar genes in encoded within Chromosome II (GenBank accession: CP030789.1) in *V. campbellii*.

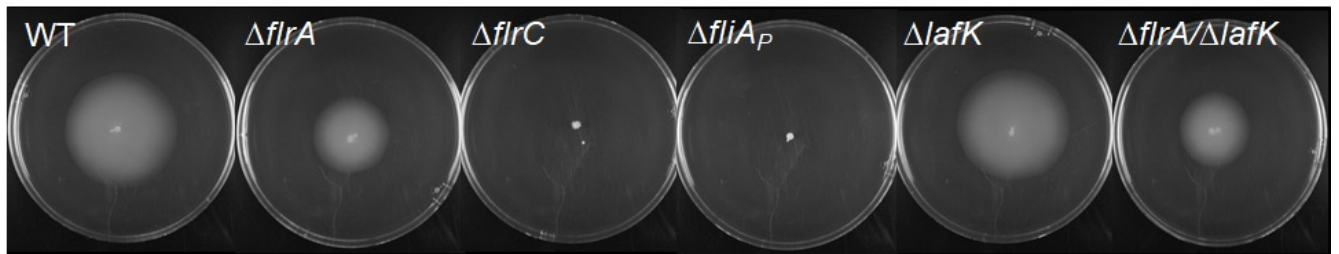

**Supplemental Fig. 2. Swimming phenotypes of *V. campbellii* BB120 flagellar regulator mutants**

A) Soft agar (0.3%) swim plates showing swim halo phenotypes for wild-type and mutant BB120 strains.

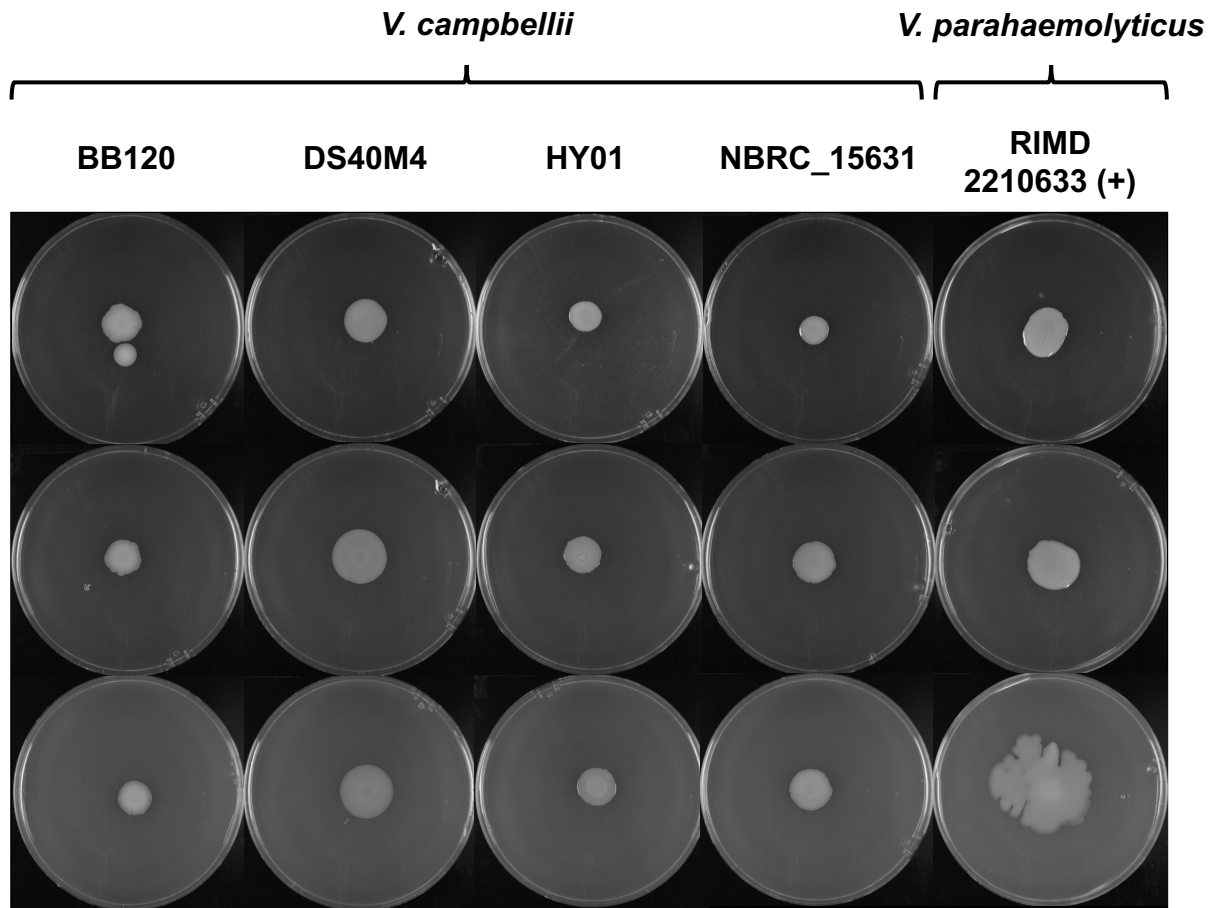

**Supplemental Fig. 3. Swarming motility in *V. campbellii***

Hard agar (0.7, 1.0, or 1.5%) swarm plates showing swarming phenotypes for each indicated *Vibrio* strain: *V. campbellii* BB120, DS40M4, HY01, and NBRC\_15631 or *V. parahaemolyticus* RIMD 2210633. All plates were incubated at 30°C for 72h.

**Table S1. Strains used in this study.**

| Name    | Description                                                       | Reference  |
|---------|-------------------------------------------------------------------|------------|
| BB120   | <i>V. campbellii</i> type strain, derivative of BB7 (wild-type)   | (1)        |
| DS40M4  | Wild-type <i>V. campbellii</i>                                    | (2)        |
| cas0034 | DS40M4, pMMB67EH-tfox-kanR                                        | (3)        |
| cas0107 | DS40M4, pMMB67EH-tfox-kanR, $\Delta luxB::spec^R$                 | This study |
| BDP107  | DS40M4, pMMB67EH-tfox-kanR, $\Delta luxB::spec^R$ , $\Delta pomA$ | This study |
| BDP033  | DS40M4, pMMB67EH-tfox-kanR, $\Delta luxB::spec^R$ , $\Delta pomB$ | This study |
| BDP114  | DS40M4, pMMB67EH-tfox-kanR, $\Delta luxB::spec^R$ , $\Delta flgT$ | This study |
| BDP135  | DS40M4, pMMB67EH-tfox-kanR, $\Delta luxB::spec^R$ , $\Delta flgO$ | This study |
| BDP116  | DS40M4, pMMB67EH-tfox-kanR, $\Delta luxB::spec^R$ , $\Delta flgP$ | This study |
| BDP117  | DS40M4, pMMB67EH-tfox-kanR, $\Delta luxB::spec^R$ , $\Delta flgN$ | This study |
| BDP045  | DS40M4, pMMB67EH-tfox-kanR, $\Delta luxB::spec^R$ , $\Delta flgM$ | This study |
| BDP117  | DS40M4, pMMB67EH-tfox-kanR, $\Delta luxB::spec^R$ , $\Delta flgA$ | This study |
| BDP134  | DS40M4, pMMB67EH-tfox-kanR, $\Delta luxB::spec^R$ , $\Delta cheV$ | This study |
| BDP113  | DS40M4, pMMB67EH-tfox-kanR, $\Delta luxB::spec^R$ , $\Delta cheR$ | This study |
| BDP144  | DS40M4, pMMB67EH-tfox-kanR, $\Delta luxB::spec^R$ , $\Delta flgB$ | This study |
| BDP108  | DS40M4, pMMB67EH-tfox-kanR, $\Delta luxB::spec^R$ , $\Delta flgC$ | This study |
| BDP109  | DS40M4, pMMB67EH-tfox-kanR, $\Delta luxB::spec^R$ , $\Delta flgD$ | This study |
| BDP110  | DS40M4, pMMB67EH-tfox-kanR, $\Delta luxB::spec^R$ , $\Delta flgE$ | This study |
| BDP111  | DS40M4, pMMB67EH-tfox-kanR, $\Delta luxB::spec^R$ , $\Delta flgF$ | This study |
| BDP112  | DS40M4, pMMB67EH-tfox-kanR, $\Delta luxB::spec^R$ , $\Delta flgG$ | This study |
| BDP125  | DS40M4, pMMB67EH-tfox-kanR, $\Delta luxB::spec^R$ , $\Delta flgH$ | This study |
| BDP146  | DS40M4, pMMB67EH-tfox-kanR, $\Delta luxB::spec^R$ , $\Delta flgI$ | This study |
| BDP123  | DS40M4, pMMB67EH-tfox-kanR, $\Delta luxB::spec^R$ , $\Delta flgJ$ | This study |
| BDP098  | DS40M4, pMMB67EH-tfox-kanR, $\Delta luxB::spec^R$ , $\Delta flgK$ | This study |

|         |                                                                   |            |
|---------|-------------------------------------------------------------------|------------|
| BDP105  | DS40M4, pMMB67EH-tfox-kanR, $\Delta luxB::spec^R$ , $\Delta flgL$ | This study |
| CAS0130 | DS40M4, pMMB67EH-tfox-kanR, $\Delta luxB::spec^R$ , $\Delta flaC$ | This study |
| CAS0149 | DS40M4, pMMB67EH-tfox-kanR, $\Delta luxB::spec^R$ , $\Delta flaB$ | This study |
| CAS0142 | DS40M4, pMMB67EH-tfox-kanR, $\Delta luxB::spec^R$ , $\Delta flaE$ | This study |
| BDP104  | DS40M4, pMMB67EH-tfox-kanR, $\Delta luxB::spec^R$ , $\Delta motY$ | This study |
| BDP118  | DS40M4, pMMB67EH-tfox-kanR, $\Delta luxB::spec^R$ , $\Delta flrD$ | This study |
| BDP136  | DS40M4, pMMB67EH-tfox-kanR, $\Delta luxB::spec^R$ , $\Delta cheW$ | This study |
| BDP119  | DS40M4, pMMB67EH-tfox-kanR, $\Delta luxB::spec^R$ , $\Delta ORF2$ | This study |
| BDP120  | DS40M4, pMMB67EH-tfox-kanR, $\Delta luxB::spec^R$ , $\Delta ORF1$ | This study |
| BDP145  | DS40M4, pMMB67EH-tfox-kanR, $\Delta luxB::spec^R$ , $\Delta cheB$ | This study |
| BDP137  | DS40M4, pMMB67EH-tfox-kanR, $\Delta luxB::spec^R$ , $\Delta cheA$ | This study |
| BDP121  | DS40M4, pMMB67EH-tfox-kanR, $\Delta luxB::spec^R$ , $\Delta cheZ$ | This study |
| BDP101  | DS40M4, pMMB67EH-tfox-kanR, $\Delta luxB::spec^R$ , $\Delta cheY$ | This study |
| BDP046  | DS40M4, pMMB67EH-tfox-kanR, $\Delta luxB::spec^R$ , $\Delta fliA$ | This study |
| ML006   | DS40M4, pMMB67EH-tfox-kanR, $\Delta luxB::spec^R$ , $\Delta flhG$ | This study |
| BDP100  | DS40M4, pMMB67EH-tfox-kanR, $\Delta luxB::spec^R$ , $\Delta flhF$ | This study |
| BDP126  | DS40M4, pMMB67EH-tfox-kanR, $\Delta luxB::spec^R$ , $\Delta flhA$ | This study |
| BDP106  | DS40M4, pMMB67EH-tfox-kanR, $\Delta luxB::spec^R$ , $\Delta flhB$ | This study |
| BDP122  | DS40M4, pMMB67EH-tfox-kanR, $\Delta luxB::spec^R$ , $\Delta fliR$ | This study |
| BDP127  | DS40M4, pMMB67EH-tfox-kanR, $\Delta luxB::spec^R$ , $\Delta fliQ$ | This study |
| BDP138  | DS40M4, pMMB67EH-tfox-kanR, $\Delta luxB::spec^R$ , $\Delta fliP$ | This study |
| BDP128  | DS40M4, pMMB67EH-tfox-kanR, $\Delta luxB::spec^R$ , $\Delta fliO$ | This study |
| BDP129  | DS40M4, pMMB67EH-tfox-kanR, $\Delta luxB::spec^R$ , $\Delta fliN$ | This study |
| BDP133  | DS40M4, pMMB67EH-tfox-kanR, $\Delta luxB::spec^R$ , $\Delta fliM$ | This study |
| BDP141  | DS40M4, pMMB67EH-tfox-kanR, $\Delta luxB::spec^R$ , $\Delta fliL$ | This study |

|         |                                                                                             |            |
|---------|---------------------------------------------------------------------------------------------|------------|
| BDP124  | DS40M4, pMMB67EH-tfox-kanR, $\Delta luxB::spec^R$ , $\Delta fliK$                           | This study |
| BDP142  | DS40M4, pMMB67EH-tfox-kanR, $\Delta luxB::spec^R$ , $\Delta fliJ$                           | This study |
| BDP130  | DS40M4, pMMB67EH-tfox-kanR, $\Delta luxB::spec^R$ , $\Delta fliI$                           | This study |
| BDP131  | DS40M4, pMMB67EH-tfox-kanR, $\Delta luxB::spec^R$ , $\Delta fliH$                           | This study |
| BDP132  | DS40M4, pMMB67EH-tfox-kanR, $\Delta luxB::spec^R$ , $\Delta fliG$                           | This study |
| BDP143  | DS40M4, pMMB67EH-tfox-kanR, $\Delta luxB::spec^R$ , $\Delta fliF$                           | This study |
| BDP102  | DS40M4, pMMB67EH-tfox-kanR, $\Delta luxB::spec^R$ , $\Delta fliE$                           | This study |
| BDP031  | DS40M4, pMMB67EH-tfox-kanR, $\Delta luxB::spec^R$ , $\Delta flrC$                           | This study |
| BDP099  | DS40M4, pMMB67EH-tfox-kanR, $\Delta luxB::spec^R$ , $\Delta flrB$                           | This study |
| BDP030  | DS40M4, pMMB67EH-tfox-kanR, $\Delta luxB::spec^R$ , $\Delta flrA$                           | This study |
| BDP150  | DS40M4, pMMB67EH-tfox-kanR, $\Delta luxB::spec^R$ , $\Delta fliS$                           | This study |
| BDP151  | DS40M4, pMMB67EH-tfox-kanR, $\Delta luxB::spec^R$ , $\Delta fliS$                           | This study |
| BDP139  | DS40M4, pMMB67EH-tfox-kanR, $\Delta luxB::spec^R$ , $\Delta fliT$                           | This study |
| BDP140  | DS40M4, pMMB67EH-tfox-kanR, $\Delta luxB::spec^R$ , $\Delta flaG$                           | This study |
| CAS0128 | DS40M4, pMMB67EH-tfox-kanR, $\Delta luxB::spec^R$ , $\Delta flaA$                           | This study |
| CAS0150 | DS40M4, pMMB67EH-tfox-kanR, $\Delta luxB::spec^R$ , $\Delta flaD$                           | This study |
| CAS0131 | DS40M4, pMMB67EH-tfox-kanR, $\Delta luxB::spec^R$ , $\Delta flaF$                           | This study |
| BDP029  | DS40M4, pMMB67EH-tfox-kanR, $\Delta luxB::spec^R$ , $\Delta rpoN$                           | This study |
| BDP103  | DS40M4, pMMB67EH-tfox-kanR, $\Delta luxB::spec^R$ , $\Delta motX$                           | This study |
| ML05    | DS40M4, pMMB67EH-tfox-kanR, $\Delta luxB::spec^R$ , $\Delta flrA$ , $\Delta flrC$           | This study |
| BDP152  | DS40M4, pMMB67EH-tfox-kanR, $\Delta flrA$ , $\Delta flrC$ , $\Delta luxB::Ptac-flrA-Tm^R$ , | This study |
| BDP153  | DS40M4, pMMB67EH-tfox-kanR, $\Delta flrA$ , $\Delta flrC$ , $\Delta luxB::Ptac-flrC-Tm^R$ , | This study |
| BDP037  | DS40M4, pMMB67EH-tfox-kanR, $\Delta rpoN$ , $\Delta luxB::rpoN-Tm^R$ ,                      | This study |



|        |                                                                                          |            |
|--------|------------------------------------------------------------------------------------------|------------|
| BDP038 | DS40M4, pMMB67EH-tfox-kanR, $\Delta$ f1rA, $\Delta$ luxB::f1rA- <i>Tm</i> <sup>R</sup> , | This study |
| BDP054 | DS40M4, pMMB67EH-tfox-kanR, $\Delta$ f1rC, $\Delta$ luxB::Ptac-f1rC-Spec <sup>R</sup> ,  | This study |
| BDP055 | DS40M4, pMMB67EH-tfox-kanR, $\Delta$ f1iA, $\Delta$ luxB::Ptac-f1iA-Spec <sup>R</sup> ,  | This study |
| AY05   | DS40M4, pMMB67EH-tfox-kanR, $\Delta$ luxB::specR, $\Delta$ lafK                          | This study |
| AY11   | DS40M4, pMMB67EH-tfox-kanR, $\Delta$ luxB::specR, $\Delta$ f1rA, $\Delta$ lafK           | This study |
| BDP024 | BB120, $\Delta$ f1rA                                                                     | This study |
| BDP025 | BB120, $\Delta$ f1rC                                                                     | This study |
| BDP026 | BB120, $\Delta$ f1iA                                                                     | This study |
| BDP027 | BB120, $\Delta$ f1rA, $\Delta$ lafK                                                      | This study |
| AY01   | BB120, $\Delta$ lafK                                                                     | This study |

**Table S2. Plasmids used in this study.**

| Name               | Description                                                                                                 | Reference  |
|--------------------|-------------------------------------------------------------------------------------------------------------|------------|
| pMMB67EH-tfoX-kanR | <i>kan</i> <sup>R</sup> , <i>Ptac-tfoX</i> , <i>lacI</i> , IncQ origin                                      | (3)        |
| pJV298             | <i>CM</i> <sup>R</sup> , <i>Ptac-gfp</i> , <i>lacI</i> , p15a origin                                        | (4)        |
| pRE112             | gene deletion vector, <i>cmR</i> (chloramphenicol resistant), <i>sacB</i> (sucrose intolerant), R6Kg origin | (5, 6)     |
| pBB11              | BB120 <i>f1rA</i> deletion construct in pRE112                                                              | This study |
| pBB12              | BB120 <i>f1rC</i> deletion construct in pRE112                                                              | This study |
| pBB13              | BB120 <i>f1iA</i> deletion construct in pRE112                                                              | This study |
| pAY01              | BB120 <i>lafK</i> deletion construct in pRE112                                                              | This study |

**Table S3. Oligonucleotides used in this study.**

| Name                                     | Sequence                                           | Notes                   |
|------------------------------------------|----------------------------------------------------|-------------------------|
| <b>Oligos for MuGENT or SOE products</b> |                                                    |                         |
| CAS0148                                  | CGTGCTCAAGTCTTCACTGATGATG                          | DS40M4 $\Delta$ luxB F1 |
| CAS0149                                  | GTCGACGGATCCCCGGAATGATGACTTGATCAG<br>AAGAACGCTTTGA | DS40M4 $\Delta$ luxB R1 |
| CAS0150                                  | GAAGCAGCTCCAGCCTACACACTCGTAACGTTTA<br>AACGATGCTGAG | DS40M4 $\Delta$ luxB F2 |
| CAS0151                                  | GGTGAATGGCCACAAGGTACCT                             | DS40M4 $\Delta$ luxB R2 |
| BP145                                    | GCGGCATGGATATCAATTCCATGGTC                         | DS40M4 delta F1rA F1    |

|       |                                                              |                                                                          |
|-------|--------------------------------------------------------------|--------------------------------------------------------------------------|
| BP180 | gctaattcagtttaagcggccatAAGCAGCTTTGCCAAACC<br>TTGCATAAG       | DS40M4 delta FlrA R1,<br>universal overlap<br>homology                   |
| BP182 | atggccgcttaaactgaattagcTAGGGTCACCCTGGCGTT<br>AAAGC           | DS40M4 delta FlrA F2,<br>universal overlap<br>homology                   |
| BP148 | AGAAAGGGAAACATCGGCATCACC                                     | DS40M4 delta FlrA R2                                                     |
| BP149 | GGTATCTAGTAAGATCACACCTGC                                     | detect delta FlrA<br>DS40M4, R                                           |
| BP150 | CGCAGTATCAACCGCCTTGAAGG                                      | DS40M4 delta RpoN<br>F1                                                  |
| BP151 | gctaattcagtttaagcggccatCATTCAGTGTTACTTACCT<br>TGTAATGCTCAG   | DS40M4 delta RpoN<br>R1, universal overlap<br>homology                   |
| BP152 | atggccgcttaaactgaattagcTAGGCACCAATTGAAAAG<br>GAAAGTCTATGC    | DS40M4 delta RpoN<br>F2 , universal overlap<br>homology                  |
| BP153 | GGAGACAGAGGCAGCGGCTA                                         | DS40M4 delta RpoN<br>R2                                                  |
| BP154 | GAATCAATTGCTGCATACATACTTTTCG                                 | detect delta RpoN<br>DS40M4, R                                           |
| BP155 | ACCTTACTTAATGAGTAGGGTGTTGTGCC                                | DS40M4 delta FlrC F1                                                     |
| BP156 | gctaattcagtttaagcggccatTTGCGCCATTATGATTCTC<br>CAGTAATTGTTATC | DS40M4 delta FlrC R1,<br>universal overlap<br>homology                   |
| BP157 | atggccgcttaaactgaattagcCCGGCTTAGTATTCACAT<br>AAATAGCCATAGG   | DS40M4 delta FlrC F2<br>, universal overlap<br>homology                  |
| BP158 | AGCAATTTCTGAATACCTTGGTCGTCC                                  | DS40M4 delta FlrC R2                                                     |
| BP159 | TGATGGCTTTCGTTAGGAGATCA                                      | detect delta FlrC<br>DS40M4, R                                           |
| BP160 | GAAGTACAGAACCTATTGAAATGCTCGG                                 | DS40M4 delta FliAp F1                                                    |
| BP161 | gctaattcagtttaagcggccatCACCAAAGGGTCCTCTG<br>TGAATTCAG        | DS40M4 delta FliAp<br>R1, universal overlap<br>homology                  |
| BP263 | atggccgcttaaactgaattagcAGCGAATCTCGCGTAAGC<br>CAAATACTG       | DS40M4 delta FliAp F2<br>, universal overlap<br>homology                 |
| BP163 | CCATACCTACGCCACGACCAGA                                       | DS40M4 delta FliAp R2                                                    |
| BP164 | CACGGATGTGTTTAAGCAGGT                                        | detect delta FliAp<br>DS40M4, R                                          |
| BP234 | gtcgacggatccccggaatCTAAAGTAGGCGTTTACGCT<br>GACTCG            | DS40M4<br>luxB::RpoN_TmR<br>complement R,<br>homology to TmR<br>cassette |
| BP235 | tcaaagcgttctctgatcaagtcctcCTATCTGTAGAAGACA<br>ACATCATGGCCGTT | DS40M4<br>luxB::RpoN_TmR<br>complement F, 500 bp<br>upstream included    |

|       |                                                                  |                                                                                               |
|-------|------------------------------------------------------------------|-----------------------------------------------------------------------------------------------|
|       |                                                                  | homology to luxB UP, v2                                                                       |
| BP241 | tcaaagcggttcttctgatcaagtcacGCGTAGCTGTCTATCT<br>ATGGAAGATGGTG     | DS40M4<br>luxB::FliA_TmR<br>complement F, 500 bp<br>upstream included,<br>homology to luxB UP |
| BP242 | gtcgcgcatccccggaatCTAGCGTTGAAGGTTGTACT<br>TACGCAT                | DS40M4<br>luxB::FliA_TmR<br>complement R,<br>homology to TmR<br>cassette                      |
| BP256 | aattcggcgtaagcttaaggagatatacatATGGCGCAAAGCA<br>AAGTGCTG          | DS40M4 FliC<br>Complement F,<br>homology to<br>upstream+Ptac from<br>pJV298                   |
| BP244 | gtcgcgcatccccggaatCTAAGCCGGAATATCGATAC<br>CAGCGTC                | DS40M4<br>luxB::FliC_TmR<br>complement R,<br>homology to TmR<br>cassette                      |
| BP257 | attcggcgtaagcttaaggagatatacatGTGAATAAAGCGAT<br>TACCTATGACCAACATG | DS40M4 FliAp<br>Complement F,<br>homology to<br>upstream+Ptac from<br>pJV298                  |
| BP246 | gtcgcgcatccccggaatTTAGTCATTTTGTGTCCACG<br>CACTGAG                | DS40M4<br>luxB::FliAp_TmR<br>complement R,<br>homology to TmR<br>cassette                     |
| BP247 | cgcttgagagtgtagcgattac                                           | detect delta luxB<br>DS40M4, F                                                                |
| BP248 | catctcagttgcctcctcattattagctg                                    | detect delta luxB<br>DS40M4, R                                                                |
| BP264 | GCCGTTTTGCCGCTTCAGTTAC                                           | DS40M4 delta FlgM F1                                                                          |
| BP265 | gtcgcgcatccccggaatTATACCTGCCATATTTCAACC<br>TTAAACTCG             | DS40M4 delta FlgM<br>R1, Ab overlap<br>homology                                               |
| BP266 | gaagcagctccagcctacaTAACTGACTTAGGCCCAAGG<br>TAAGC                 | DS40M4 delta FlgM F2<br>, Ab overlap homology                                                 |
| BP267 | TGTTATTACGTCGCCAATCTGC                                           | DS40M4 delta FlgM R2                                                                          |
| BP268 | CCTGACTTAGGCTTTCGTCTTCGG                                         | detect delta FlgM<br>DS40M4, R                                                                |
| BP374 | CACTTGCTCATTCAAATAAGGCTGAATCG                                    | DS40M4 delta fliK F1                                                                          |
| BP375 | gctaattcagtttaagcgccatGTGGTTTCAAAGCGTGAT<br>GGAATTAG             | DS40M4 delta fliK R1,<br>universal overlap<br>homology                                        |

|       |                                                              |                                                         |
|-------|--------------------------------------------------------------|---------------------------------------------------------|
| BP376 | atggccgcttaaactgaattagcCATATAGAACTCTCGTC<br>ATCGGCAGC        | DS40M4 delta fliK F2,<br>universal overlap<br>homology  |
| BP377 | CTGACAGAAGAACAGATTGAGTTGATCAAG                               | DS40M4 delta fliK R2                                    |
| BP378 | ATTGATTGAGCAAGGTCTCTGTTTACTC                                 | DS40M4 delta fliK<br>detect, R, 250 bp<br>downstream    |
| BP379 | CAGCGCTGCGGTTTCGATCATC                                       | DS40M4 delta fliE F1                                    |
| BP380 | gctaattcagtttaagcggccatGTAATTTTAGGTAATAAGT<br>GTGGCAGACAAGTC | DS40M4 delta fliE R1,<br>universal overlap<br>homology  |
| BP381 | atggccgcttaaactgaattagcTGTCACCTCTAAGCCAAA<br>AGTTTGAC        | DS40M4 delta fliE F2 ,<br>universal overlap<br>homology |
| BP382 | CGATCTGGACCACAACATGAATGC                                     | DS40M4 delta fliE R2                                    |
| BP383 | TGGAAACGCTGATCGAATGCAACGG                                    | detect delta fliE<br>DS40M4, R, 250 bp<br>downstream    |
| BP384 | TTTTGAACGATTCATCAGCAACGCC                                    | DS40M4 delta flhA F1                                    |
| BP385 | gctaattcagtttaagcggccatTAACCCGCGCATCATTAAT<br>GGATTTATAG     | DS40M4 delta flhA R1,<br>universal overlap<br>homology  |
| BP386 | atggccgcttaaactgaattagcCATACTGCGAGGTGTCTC<br>AATCGG          | DS40M4 delta flhA F2 ,<br>universal overlap<br>homology |
| BP387 | CGTGGTGGTGATGTCCATCTTGCG                                     | DS40M4 delta flhA R2                                    |
| BP388 | CGTCACTAATGAAAATAATTGCATGGTGTG                               | detect delta flhA<br>DS40M4, R, 250 bp<br>downstream    |
| BP389 | AACAAGCTGCTCAGAAAGCAGCTC                                     | DS40M4 delta flhF F1                                    |
| BP390 | gctaattcagtttaagcggccatGGGCGGCGGACTACTATG<br>ACTG            | DS40M4 delta flhF R1,<br>universal overlap<br>homology  |
| BP391 | atggccgcttaaactgaattagcCAAACATAAATCCATTAA<br>TGATGCGCGGG     | DS40M4 delta flhF F2 ,<br>universal overlap<br>homology |
| BP392 | GCGTCGCAAGCGGATTTGATTCAG                                     | DS40M4 delta flhF R2                                    |
| BP393 | CCGGTATTGAACCGGGATTGGCTG                                     | detect delta flhF<br>DS40M4, R, 250 bp<br>downstream    |
| BP394 | ATCACGACCATGTCTGGTTGTGCG                                     | DS4 delta flgK F1                                       |
| BP395 | gctaattcagtttaagcggccatATCTGACGCCATACATGC<br>CCC             | DS4 delta flgK R1,<br>universal overlap<br>homology     |
| BP396 | atggccgcttaaactgaattagcAGGAGGCCTTAGATGTCA<br>ACGCG           | DS4 delta flgK F2,<br>universal overlap<br>homology     |
| BP397 | GGCTAGGTTGGTAGCCAGAGCC                                       | DS4 delta flgK R2                                       |
| BP398 | ACTTCTTGGTTTTCTAGACGGTTACGAAC                                | DS4 delta flgK detect,<br>R, 250bp downstream           |

|       |                                                            |                                                                     |
|-------|------------------------------------------------------------|---------------------------------------------------------------------|
| BP399 | ACTGAGCCTTGACCAGTCAATGTGC                                  | DS4 delta flrB (flaL) F1                                            |
| BP400 | gctaattcagtttaagcggccatTAAGCGGCTTTTGTGCGATA<br>ACAATTA CTG | DS4 delta flrB (flaL)<br>R1, universal overlap<br>homology          |
| BP401 | atggccgcttaaactgaattagcCATTCACTGCCTGTGCGAA<br>ATATCGC      | DS4 delta flrB (flaL) F2,<br>universal overlap<br>homology          |
| BP402 | TTAGAAATCAACTATGACATGTTGGATCGC                             | DS4 delta flrB (flaL) R2                                            |
| BP403 | TAGGGATGCGACGCACAACACTG                                    | DS4 delta flrB (flaL)<br>detect, R, 250bp<br>downstream             |
| BP404 | TAAGTGAACACAAACCGTTTGATAGCAC                               | DS4 delta motX F1                                                   |
| BP405 | gctaattcagtttaagcggccatCGCGACACCTTCTGGTAG<br>ATGTA CTG     | DS4 delta motX R1,<br>universal overlap<br>homology                 |
| BP406 | atggccgcttaaactgaattagcGTGTAGATGGGGACAGG<br>CGC            | DS4 delta motX F2,<br>universal overlap<br>homology                 |
| BP407 | CGATTCGGTCGTGTCTTAAAAGACAATAAC                             | DS4 delta motX R2                                                   |
| BP408 | AAAATGCGACTCACTGTGGCAAATATTTG                              | DS4 delta motX detect,<br>R, 250bp downstream                       |
| BP409 | CTATGGTATCTGCGCCCGACCTAGG                                  | DS4 delta motY F1                                                   |
| BP410 | gctaattcagtttaagcggccatCGCACCCAGGTTTGATCT<br>TAAATATTCAC   | DS4 delta motY R1,<br>universal overlap<br>homology                 |
| BP411 | atggccgcttaaactgaattagcCATCTAGGTACTTCTCTC<br>AAACGGCAG     | DS4 delta motY F2,<br>universal overlap<br>homology                 |
| BP412 | ACATGATCCAATGTGCAGCTGGTG                                   | DS4 delta motY R2                                                   |
| BP413 | AAACCGCAATTTGGGAGAAATGTAAAATTC                             | DS4 delta motY detect,<br>R, 250bp downstream                       |
| BP414 | ATATCGGTTTTATTCATGACATCAGTTCCC                             | DS4 delta flgL F1                                                   |
| BP415 | gctaattcagtttaagcggccatCATCTAAGGCCTCCTTTAG<br>CGCAAC       | DS4 delta flgL R1,<br>universal overlap<br>homology                 |
| BP416 | atggccgcttaaactgaattagcTAACGCGCCTATAGTCTA<br>TGCAGTGC      | DS4 delta flgL F2,<br>universal overlap<br>homology                 |
| BP417 | TGATAGCCACAGATTCTTGTGCGCC                                  | DS4 delta flgL R2                                                   |
| BP418 | ATAAACAACAAGTTATAGCGCATATGGGG                              | DS4 delta flgL detect,<br>R, 250bp downstream                       |
| BP419 | ATTGTCTAATGGCTTGATCACCCTTC                                 | DS4 delta cheY<br>(DSB67_11290) F1                                  |
| BP420 | gctaattcagtttaagcggccatTTTACGGCTGCAACGCTA<br>AAAGAAAAAC    | DS4 delta cheY<br>DSB67_11290) R1,<br>universal overlap<br>homology |
| BP421 | atggccgcttaaactgaattagcGCGCATTGTTGAGAAATC<br>ATCAACAATAAGG | DS4 delta cheY<br>(DSB67_11290) F2,                                 |

|       |                                                        |                                                          |
|-------|--------------------------------------------------------|----------------------------------------------------------|
|       |                                                        | universal overlap homology, v2                           |
| BP422 | GGCGCAGCTCAACCAAATCG                                   | DS4 delta cheY (DSB67_11290) R2, v2                      |
| BP423 | AAGCACTGGTTGAATCAATAAAACAACCTTC                        | DS4 delta cheY (DSB67_11290) detect, R, 250bp downstream |
| BP424 | GAATCGACGTCATCTCTTCGCGCATG                             | DS4 delta flhB F1                                        |
| BP425 | gctaattcagtttaagcggccatCGTCACTAATGAAAATAAT TGCATGGTGTG | DS4 delta flhB R1, universal overlap homology            |
| BP426 | atggccgcttaaactgaattagcCAATCCAGCCTCCTAGCA ATCCAAG      | DS4 delta flhB F2, universal overlap homology            |
| BP427 | AGATAAAATGGCGGTACAAATCTCCG                             | DS4 delta flhB R2                                        |
| BP428 | TTAAGACGGCACTCAGTATGTGCTTG                             | DS4 delta flhB detect, R, 250bp downstream               |
| BP429 | AGCTGCTTCTAGCGCGTTACCTAAG                              | DS4 delta pomA F1                                        |
| BP430 | gctaattcagtttaagcggccatACAAAGCACTCCTTTTCGCT ATACTTAAAC | DS4 delta pomA R1, universal overlap homology            |
| BP431 | atggccgcttaaactgaattagcTCCGGAGGTCATCTGATG GATGAAG      | DS4 delta pomA F2, universal overlap homology            |
| BP432 | CGTTGTTGCGATGTTGTGTTTGC                                | DS4 delta pomA R2                                        |
| BP433 | AACTCTTGCGCAATGATGCTGGTG                               | DS4 delta pomA detect, R, 250bp downstream               |
| BP434 | ATCAAGAACTCAGATCCAGCGTACG                              | DS4 delta flgT F1                                        |
| BP435 | gctaattcagtttaagcggccatGCAACACGTATAATGCCTT GCGATATG    | DS4 delta flgT R1, universal overlap homology            |
| BP436 | atggccgcttaaactgaattagcTGTTAGTAACCGTTCGGG TATAAATATTGC | DS4 delta flgT F2, universal overlap homology            |
| BP437 | ACAAAGTACGCTAAGTCTATCGGCATTTTG                         | DS4 delta flgT R2                                        |
| BP438 | CTTTACCATTGTAATTGGTGAGTAGGCCG                          | DS4 delta flgT detect, R, 250bp downstream               |
| BP439 | GACAACCTAGGTGACTTTGACCAAAC                             | DS4 delta flgO F1                                        |
| BP440 | gctaattcagtttaagcggccatGCCATCTTTTCATGGTTTG ATTCTCCAG   | DS4 delta flgO R1, universal overlap homology            |
| BP441 | atggccgcttaaactgaattagcGCCCGTAGGAACTAGC ATGAAGAAG      | DS4 delta flgO F2, universal overlap homology            |
| BP442 | CTTCTTG TGCCATTTCAAGCAGC                               | DS4 delta flgO R2                                        |
| BP443 | TGATCGGCAAGTTCTGCACGCC                                 | DS4 delta flgO detect, R, 250bp downstream               |
| BP444 | GGTGAAAACAACCCAATCGCTTCAAAC                            | DS4 delta flgP F1                                        |

|       |                                                           |                                                     |
|-------|-----------------------------------------------------------|-----------------------------------------------------|
| BP445 | gctaattcagtttaagcggccatTGCTAGTTTCCTACGGGC<br>GGAGAATC     | DS4 delta flgP R1,<br>universal overlap<br>homology |
| BP446 | atggccgcttaaactgaattagcAGCAGACCTTGTTCTAAT<br>ACAACTTCAC   | DS4 delta flgP F2,<br>universal overlap<br>homology |
| BP447 | TTGCGGCCAGTCACGACATCAC                                    | DS4 delta flgP R2                                   |
| BP448 | GGTAAGGTCGGCATGACCTACAATG                                 | DS4 delta flgP detect,<br>R, 250bp downstream       |
| BP449 | AACCGCGACACCTGCTATATAGC                                   | DS4 delta flgN F1                                   |
| BP450 | gctaattcagtttaagcggccatAACTCTTTGAATCAATTCC<br>ACGACTACTC  | DS4 delta flgN R1,<br>universal overlap<br>homology |
| BP451 | atggccgcttaaactgaattagcGAATGCTTACCTTGGGCC<br>TAAGTC       | DS4 delta flgN F2,<br>universal overlap<br>homology |
| BP452 | CAAATTTGTCCGTTAAACCCGTCAGTG                               | DS4 delta flgN R2                                   |
| BP453 | AAAAGCGCCAGCACAACAAGACG                                   | DS4 delta flgN detect,<br>R, 250bp downstream       |
| BP454 | GTTTTGCCGTCAAAGACCTTCATCTC                                | DS4 delta flgA F1                                   |
| BP455 | gctaattcagtttaagcggccatGGGTTGGCTGTTGTACGG<br>CAAATC       | DS4 delta flgA R1,<br>universal overlap<br>homology |
| BP456 | atggccgcttaaactgaattagcACTGTTTCTCTGGTATTAT<br>GCCTGCC     | DS4 delta flgA F2,<br>universal overlap<br>homology |
| BP457 | GCAGCAGCATTGTTTACTAGAATCCG                                | DS4 delta flgA R2                                   |
| BP458 | CTAGTGGATGCAGATTTGGCATCG                                  | DS4 delta flgA detect,<br>R, 250bp downstream       |
| BP459 | GAAAGAGCAGTCACACCTAAGATTATCTG                             | DS4 delta cheV F1                                   |
| BP460 | gctaattcagtttaagcggccatCGTCATATGCTCATCTCCA<br>TCTCAAAC    | DS4 delta cheV R1,<br>universal overlap<br>homology |
| BP461 | atggccgcttaaactgaattagcGGTAACGCGGTAAATCT<br>GCATTAACAC    | DS4 delta cheV F2,<br>universal overlap<br>homology |
| BP462 | TGTAATGCTTGAACCTTCGTGGAAC                                 | DS4 delta cheV R2                                   |
| BP463 | CCACAATGTTTCGTTAGTCGTCATCG                                | DS4 delta cheV detect,<br>R, 250bp downstream       |
| BP464 | GGCATTGAAAGTACATCGGGCGC                                   | DS4 delta cheR F1                                   |
| BP465 | gctaattcagtttaagcggccatAAAGTCACGATACTTTGA<br>TCACTGATTG   | DS4 delta cheR R1,<br>universal overlap<br>homology |
| BP466 | atggccgcttaaactgaattagcCAACACGCTTACTAGCTG<br>ACTCTTTTAATG | DS4 delta cheR F2,<br>universal overlap<br>homology |
| BP467 | AACACGCACTAGCGCCACACG                                     | DS4 delta cheR R2                                   |
| BP468 | AAGCCAAAGTGATTGATGGAGTGTC                                 | DS4 delta cheR detect,<br>R, 250bp downstream       |
| BP469 | TTTTATTGATCGATTTGCCGTACAACAGC                             | DS4 delta flgB F1                                   |

|       |                                                           |                                                     |
|-------|-----------------------------------------------------------|-----------------------------------------------------|
| BP470 | gctaattcagtttaagcggccatTGTTTGCCTCTACAGTAAG<br>AACTGACC    | DS4 delta flgB R1,<br>universal overlap<br>homology |
| BP471 | atggccgcttaaactgaattagcAGCAATCAAAGGGGAATA<br>ATTTAGATGAGC | DS4 delta flgB F2,<br>universal overlap<br>homology |
| BP472 | AGTTATGTCCTGGACGTTCCGTCATG                                | DS4 delta flgB R2                                   |
| BP473 | GTTGTACTCCGCATTCCAGCGGTTTG                                | DS4 delta flgB detect,<br>R, 250bp downstream       |
| BP474 | ACAATCATTGGTACAGACGCTGAGATC                               | DS4 delta flgC F1                                   |
| BP475 | gctaattcagtttaagcggccatAGCTCATCTAAATTATTCC<br>CCTTTGATTGC | DS4 delta flgC R1,<br>universal overlap<br>homology |
| BP476 | atggccgcttaaactgaattagcGCAGATGGGTCAATAAG<br>GATAAGGGG     | DS4 delta flgC F2,<br>universal overlap<br>homology |
| BP477 | TTCAATCGCACCGGTTTGGATGC                                   | DS4 delta flgC R2                                   |
| BP478 | CTTGCCGATGCCATCTACGGTCG                                   | DS4 delta flgC detect,<br>R, 250bp downstream       |
| BP479 | AAAAGTTTGAGATGGAGATGAGCATATGAC                            | DS4 delta flgD F1                                   |
| BP480 | gctaattcagtttaagcggccatTTCCGGCCATACGCTACC<br>CC           | DS4 delta flgD R1,<br>universal overlap<br>homology |
| BP481 | atggccgcttaaactgaattagcTTCAATAGCGCGTCAGGT<br>TAGGAG       | DS4 delta flgD F2,<br>universal overlap<br>homology |
| BP482 | TTCTGACCGATTGGCTCAAGACCAC                                 | DS4 delta flgD R2                                   |
| BP483 | AATGCTTGAACCTTCGTGGAACG                                   | DS4 delta flgD detect,<br>R, 250bp downstream       |
| BP484 | TGGTCATTTTCAGATATCGAAATGCCAG                              | DS4 delta flgE F1                                   |
| BP485 | gctaattcagtttaagcggccatTTCCAAAATCTCCTAACCT<br>GACGCG      | DS4 delta flgE R1,<br>universal overlap<br>homology |
| BP486 | atggccgcttaaactgaattagcAGCGCTAGTTAGATAGCT<br>CTATCATCTG   | DS4 delta flgE F2,<br>universal overlap<br>homology |
| BP487 | GGCAATGTTGCCGTTACCATAACTG                                 | DS4 delta flgE R2                                   |
| BP488 | TAAATTGAGGGTTTTTCAGATGGCAATTCAG                           | DS4 delta flgE detect,<br>R, 250bp downstream       |
| BP489 | TTCCTGCCACTACAACCTTGGTTCG                                 | DS4 delta flgF F1                                   |
| BP490 | gctaattcagtttaagcggccatCGCGATCCATAAATTACTC<br>CAAAGTTCTC  | DS4 delta flgF R1,<br>universal overlap<br>homology |
| BP491 | atggccgcttaaactgaattagcCAGAGTTAGAGGTTACACA<br>ATGCATCC    | DS4 delta flgF F2,<br>universal overlap<br>homology |
| BP492 | TGACGGTAGAACTTTTCGTTTTGGC                                 | DS4 delta flgF R2                                   |
| BP493 | TGCGTCGCAACCACTTTAGAACCG                                  | DS4 delta flgF detect,<br>R, 250bp downstream       |
| BP494 | AAGCAATTGTCTCAGCAGGACCC                                   | DS4 delta flgG F1                                   |



|       |                                                        |                                                      |
|-------|--------------------------------------------------------|------------------------------------------------------|
| BP495 | gctaattcagtttaagcggccatGCATTGTGAACCTCTAACTCTGTAACTC    | DS4 delta flgG R1, universal overlap homology        |
| BP496 | atggccgcttaaactgaattagcTACTAAGATCGGGATTTAGGGAGCC       | DS4 delta flgG F2, universal overlap homology        |
| BP497 | TAGCAAAAGGTGTGCCAGTTTAGG                               | DS4 delta flgG R2                                    |
| BP498 | TTTTGTTTAGGATGAATCGGTGCC                               | DS4 delta flgG detect, R, 250bp downstream           |
| BP499 | TTTACACCAACAACCCAATGGATCTG                             | DS4 delta flgH F1                                    |
| BP500 | gctaattcagtttaagcggccatTCATTGGCTCCCTAAATCCCGATC        | DS4 delta flgH R1, universal overlap homology        |
| BP501 | atggccgcttaaactgaattagcGACGTCGAAAAGACGGCAAATTGAC       | DS4 delta flgH F2, universal overlap homology        |
| BP502 | TGAACATCTGGTGAGCCATCAATCATC                            | DS4 delta flgH R2                                    |
| BP503 | AATGCCGAAGTTTTGCAGCATTGCC                              | DS4 delta flgH detect, R, 250bp downstream           |
| BP504 | GTGTGGCGCTAGTGCGTGTTCC                                 | DS4 delta flgI F1                                    |
| BP505 | gctaattcagtttaagcggccatTGCTTACTCAATCTCTTGTAGTCAATTTGC  | DS4 delta flgI R1, universal overlap homology        |
| BP506 | atggccgcttaaactgaattagcTCGATTAGGAGAGAAACCATGGTCAAG     | DS4 delta flgI F2, universal overlap homology        |
| BP507 | TGAAGGTGTCATTGGCTGCCTGC                                | DS4 delta flgI R2                                    |
| BP508 | ATTTGACGGTAGAACTTTTCGTTTTGGC                           | DS4 delta flgI detect, R, 250bp downstream           |
| BP509 | TTTAAAGATACCAATGGCTTATTCCGCC                           | DS4 delta flgJ F1                                    |
| BP510 | gctaattcagtttaagcggccatACCATGGTTTCTCTCCTAACTCGATTAGATG | DS4 delta flgJ R1, universal overlap homology        |
| BP511 | atggccgcttaaactgaattagcTTCACCCGATTACGAATGCTTGATAGAC    | DS4 delta flgJ F2, universal overlap homology        |
| BP512 | ATGCGTCAGATACTGAGCTCTCTG                               | DS4 delta flgJ R2                                    |
| BP513 | AGAAATGTTATGACCAGTCGTATTCAACTG                         | DS4 delta flgJ detect, R, 250bp downstream           |
| BP514 | CTCATGAGTCTTCTTCATTGCTTCTGC                            | DS4 delta ORF3 (flrD) F1                             |
| BP515 | gctaattcagtttaagcggccatCGCGGAAGACGTCGATAAAGATTG        | DS4 delta ORF3 (flrD) R1, universal overlap homology |
| BP516 | atggccgcttaaactgaattagcGATTCATCAGCCAATTACAGGTGAGC      | DS4 delta ORF3 (flrD) F2, universal overlap homology |
| BP517 | GTCCGATGGCAGCGAAATTCCG                                 | DS4 delta ORF3 (flrD) R2                             |

|       |                                                           |                                                   |
|-------|-----------------------------------------------------------|---------------------------------------------------|
| BP518 | AACACGCGTATCATCGTGATTGAG                                  | DS4 delta ORF3 (flrD) detect, R, 250bp downstream |
| BP519 | TTTCAACAATGCATCCCCACGACGG                                 | DS4 delta cheW F1                                 |
| BP520 | gctaattcagtttaagcggccatATTGGCTGATGAATCATG<br>GCTGAAG      | DS4 delta cheW R1, universal overlap homology     |
| BP521 | atggccgcttaaactgaattagcAGTTAATCCTCGTTAATGT<br>CGTTCCCG    | DS4 delta cheW F2, universal overlap homology     |
| BP522 | AGATGGCGATTAAAGTACTAGTCGTTGATG                            | DS4 delta cheW R2                                 |
| BP523 | ACGTCGTCATGCTTGGTGAAAGCATG                                | DS4 delta cheW detect, R, 250bp downstream        |
| BP524 | GTGCCCCACATCGGTTTGCC                                      | DS4 delta ORF2 F1                                 |
| BP525 | gctaattcagtttaagcggccatTGCTAAACGCAGGTTTAG<br>ATGTAAAATCAC | DS4 delta ORF2 R1, universal overlap homology     |
| BP526 | atggccgcttaaactgaattagcTTATTGCTCATCGAACGC<br>TAACCTCTC    | DS4 delta ORF2 F2, universal overlap homology     |
| BP527 | GACGAAGAAATGTCGAAAGCGGTAG                                 | DS4 delta ORF2 R2                                 |
| BP528 | GTGGCTTCAAATTGACTATCGTTCCG                                | DS4 delta ORF2 detect, R, 250bp downstream        |
| BP529 | GTTCAAGATATCCGCTTGACGGCG                                  | DS4 delta ORF1 F1                                 |
| BP530 | gctaattcagtttaagcggccatGATGAGCAATAACGACAT<br>ACTTTCCAGTG  | DS4 delta ORF1 R1, universal overlap homology     |
| BP531 | atggccgcttaaactgaattagcGATCTTTCCTACGCTAAG<br>CCCACTTC     | DS4 delta ORF1 F2, universal overlap homology     |
| BP532 | GAAGTGGTCGCTACAGTTGAAGCGC                                 | DS4 delta ORF1 R2                                 |
| BP533 | GGTTCCGCTGCAAAAGTCTACGG                                   | DS4 delta ORF1 detect, R, 250bp downstream        |
| BP534 | TTTTCAATCTTTATCGACGTCTTCCGC                               | DS4 delta cheB F1                                 |
| BP535 | gctaattcagtttaagcggccatGGAAAGATCATGATCGTTT<br>GGAGTG TAG  | DS4 delta cheB R1, universal overlap homology     |
| BP536 | atggccgcttaaactgaattagcCTTATTCTTTTATCGACT<br>CCAGCTTCG    | DS4 delta cheB F2, universal overlap homology     |
| BP537 | CGCTCGTTCAGATGCTAGAAAGTGG                                 | DS4 delta cheB R2                                 |
| BP538 | GGCCACGGCCATGTAGTTATCGTAC                                 | DS4 delta cheB detect, R, 250bp downstream        |
| BP539 | AGTGATTTTACATCTAAACCTGCGTTTAGC                            | DS4 delta cheA F1                                 |
| BP540 | gctaattcagtttaagcggccatAGCGAAGCTGGAGTCGAT<br>AAAAGG       | DS4 delta cheA R1, universal overlap homology     |

|       |                                                          |                                                     |
|-------|----------------------------------------------------------|-----------------------------------------------------|
| BP541 | atggccgcttaaactgaattagcACGTTACCTTTAAAATCCA<br>AGACTGGAC  | DS4 delta cheA F2,<br>universal overlap<br>homology |
| BP542 | AATACATGATTGCGAAAGCAAATGAACTG                            | DS4 delta cheA R2                                   |
| BP543 | GTCAAATCATTTCGTCGCGTGATCAC                               | DS4 delta cheA detect,<br>R, 250bp downstream       |
| BP544 | CACTTGGATTTTGCAAAGCGTGTTG                                | DS4 delta cheZ F1                                   |
| BP545 | gctaattcagtttaagcggccatAAGGTAACGTATGAGCTA<br>CGATTTAGACG | DS4 delta cheZ R1,<br>universal overlap<br>homology |
| BP546 | atggccgcttaaactgaattagcCTCTAGTGAGATCATCCT<br>GAATAGACCC  | DS4 delta cheZ F2,<br>universal overlap<br>homology |
| BP547 | AAGAGGTAGAGCGTCGTGAGCC                                   | DS4 delta cheZ R2                                   |
| BP548 | ATGATCACAGCGGAAGCAAAGCG                                  | DS4 delta cheZ detect,<br>R, 250bp downstream       |
| BP549 | CCACACCAAGCTGAAGTTGGTCAGG                                | DS4 delta fliR F1                                   |
| BP550 | gctaattcagtttaagcggccatGGAGGCTGGATTGGCAGA<br>GTCAG       | DS4 delta fliR R1,<br>universal overlap<br>homology |
| BP551 | atggccgcttaaactgaattagcACGCGCCTCTAGTAAAGC<br>ACCTG       | DS4 delta fliR F2,<br>universal overlap<br>homology |
| BP552 | GATTGTCCGTGGTCGGATGCCG                                   | DS4 delta fliR R2                                   |
| BP553 | TTCCGTGACGCACTGTGGATGG                                   | DS4 delta fliR detect,<br>R, 250bp downstream       |
| BP554 | ATGTCTTCATCAGTATTTTGACGCGTTAC                            | DS4 delta fliQ F1                                   |
| BP555 | gctaattcagtttaagcggccatGAGGCGCGTATGGAGTAT<br>CCGAC       | DS4 delta fliQ R1,<br>universal overlap<br>homology |
| BP556 | atggccgcttaaactgaattagcGTCTTACCCTCTTCTCTCT<br>GTGCC      | DS4 delta fliQ F2,<br>universal overlap<br>homology |
| BP557 | CGGTAGAGCAACTGCGTTCACCAAC                                | DS4 delta fliQ R2                                   |
| BP558 | CGGCATTCACTTACCTCTGAGCTCAAG                              | DS4 delta fliQ detect,<br>R, 250bp downstream       |
| BP559 | TGGTCAATCAAACCAGCGTTCAAG                                 | DS4 delta fliP F1                                   |
| BP560 | gctaattcagtttaagcggccatGATTGGCACAGAGAGAAG<br>AGGGTAAG    | DS4 delta fliP R1,<br>universal overlap<br>homology |
| BP561 | atggccgcttaaactgaattagcGGCGGATTGAGTTATCCT<br>TTGTCATG    | DS4 delta fliP F2,<br>universal overlap<br>homology |
| BP562 | CTCAGCAGCAAGCGCGTGATG                                    | DS4 delta fliP R2                                   |
| BP563 | TGTTGAAACGCATGCAAGTGCCAG                                 | DS4 delta fliP detect,<br>R, 250bp downstream       |
| BP564 | CAGAACTTGTGCCACGGCAGTAAATAAAC                            | DS4 delta fliO F1                                   |
| BP565 | gctaattcagtttaagcggccatCATGACAAAGGATAACTC<br>AATCCGCC    | DS4 delta fliO R1,<br>universal overlap<br>homology |

|       |                                                           |                                                     |
|-------|-----------------------------------------------------------|-----------------------------------------------------|
| BP566 | atggccgcttaaactgaattagcGCTTCAATCGAGTTTTGA<br>TTGAACTGC    | DS4 delta fliO F2,<br>universal overlap<br>homology |
| BP567 | CCGGTACAAGAATTAGCGCAATTCG                                 | DS4 delta fliO R2                                   |
| BP568 | CGACACCATCATGGACATCCCAGTC                                 | DS4 delta fliO detect,<br>R, 250bp downstream       |
| BP569 | ACGGAATATCGATCGCCACGACG                                   | DS4 delta fliN F1                                   |
| BP570 | gctaattcagtttaagcggccatTGATCAGCCAACTGAAC<br>GCATC         | DS4 delta fliN R1,<br>universal overlap<br>homology |
| BP571 | atggccgcttaaactgaattagcTTTTCTGTCCTGTGTTAAA<br>CCTTACTTGC  | DS4 delta fliN F2,<br>universal overlap<br>homology |
| BP572 | AAAAGAAACATTGGATGCAAATGGTAAACC                            | DS4 delta fliN R2                                   |
| BP573 | ACTTACCGCGTGAAGATGGGGC                                    | DS4 delta fliN detect,<br>R, 250bp downstream       |
| BP574 | ACGATCAGCACTGATGCCGATGC                                   | DS4 delta fliM F1                                   |
| BP575 | gctaattcagtttaagcggccatAAACCCTTACTCAATACCA<br>TCGCCTC     | DS4 delta fliM R1,<br>universal overlap<br>homology |
| BP576 | atggccgcttaaactgaattagcTGGCTTAATAGATCGGTC<br>ACGTTATACC   | DS4 delta fliM F2,<br>universal overlap<br>homology |
| BP577 | TTCTAAGCGTTTCTCATCGTTATATTGCG                             | DS4 delta fliM R2                                   |
| BP578 | AATCAAAGCCCAGCTGATGGTGC                                   | DS4 delta fliM detect,<br>R, 250bp downstream       |
| BP579 | TTCGTTGATAGAGGTTGCCGCTTGG                                 | DS4 delta fliL F1                                   |
| BP580 | gctaattcagtttaagcggccatGGTATAACGTGACCGATC<br>TATTAAGCCAAG | DS4 delta fliL R1,<br>universal overlap<br>homology |
| BP581 | atggccgcttaaactgaattagcTTCTGCCATTAAGTCTCT<br>TATTGTTCTG   | DS4 delta fliL F2,<br>universal overlap<br>homology |
| BP582 | CATGAAAGAGTCTGTGCCTTATGACATG                              | DS4 delta fliL R2                                   |
| BP583 | AAATGTTGTCTCAGCAAGGCATGC                                  | DS4 delta fliL detect,<br>R, 250bp downstream       |
| BP584 | TTTTCAATCACTGGCTTACCCACCG                                 | DS4 delta fliJ F1                                   |
| BP585 | gctaattcagtttaagcggccatAGCGTTTCTCATCGTTATA<br>TTGCGTTAG   | DS4 delta fliJ R1,<br>universal overlap<br>homology |
| BP586 | atggccgcttaaactgaattagcACGCTATTACCCACCCAA<br>GATGCTC      | DS4 delta fliJ F2,<br>universal overlap<br>homology |
| BP587 | CTGGTGGCTGCTCTGGGTGAG                                     | DS4 delta fliJ R2                                   |
| BP588 | TTATGCCACAAATCACCCACAGAAGAG                               | DS4 delta fliJ detect, R,<br>250bp downstream       |
| BP589 | TTTTCCTTTTGGTGCATCCGCACC                                  | DS4 delta fliI F1                                   |
| BP590 | gctaattcagtttaagcggccatATAGCGTATGAATAATGC<br>GATGGAATTCC  | DS4 delta fliI R1,<br>universal overlap<br>homology |

|       |                                                           |                                                     |
|-------|-----------------------------------------------------------|-----------------------------------------------------|
| BP591 | atggccgcttaaactgaattagcTTGCATGGACTACTCGCC<br>CC           | DS4 delta fliI F2,<br>universal overlap<br>homology |
| BP592 | ATTACGGTAACCGATCAACACGGTC                                 | DS4 delta fliI R2                                   |
| BP593 | CGCTGCCTATTTCTGGTCATCC                                    | DS4 delta fliI detect, R,<br>250bp downstream       |
| BP594 | TGCGCCACGTTGCTTGTGTTGTG                                   | DS4 delta fliH F1                                   |
| BP595 | gctaattcagtttaagcggccatGTCCATGCAAGCCTTGGC<br>CG           | DS4 delta fliH R1,<br>universal overlap<br>homology |
| BP596 | atggccgcttaaactgaattagcCCATGCTTAACCTACAAT<br>CTGTCTATGTTG | DS4 delta fliH F2,<br>universal overlap<br>homology |
| BP597 | AGTGTTGCCTTCGATGCCACTGTAC                                 | DS4 delta fliH R2                                   |
| BP598 | GCGACGATATCGAAGCAATGCCTCC                                 | DS4 delta fliH detect,<br>R, 250bp downstream       |
| BP599 | GCAA AACTGAACAATGGTTAACGTGG                               | DS4 delta fliG F1                                   |
| BP600 | gctaattcagtttaagcggccatATCCTTTCTTGTTCCTCCT<br>GTTTAGGC    | DS4 delta fliG R1,<br>universal overlap<br>homology |
| BP601 | atggccgcttaaactgaattagcTCGTTAGCCATTTTCGTT<br>CATCCAG      | DS4 delta fliG F2,<br>universal overlap<br>homology |
| BP602 | GAAAGGTGCATTTACTGGCGCGG                                   | DS4 delta fliG R2                                   |
| BP603 | TGCTCAACCCAGCAAGTGGC                                      | DS4 delta fliG detect,<br>R, 250bp downstream       |
| BP604 | GCCATTTACGAGACAAGACAATGTG                                 | DS4 delta fliF F1                                   |
| BP605 | gctaattcagtttaagcggccatAATGGCTAACGATATCGTA<br>CCTCAAGATG  | DS4 delta fliF R1,<br>universal overlap<br>homology |
| BP606 | atggccgcttaaactgaattagcGCCACACTTATTACCTAA<br>AATTACACTGGC | DS4 delta fliF F2,<br>universal overlap<br>homology |
| BP607 | ATAGCTTGGTACGCTAATTGCTTGC                                 | DS4 delta fliF R2                                   |
| BP608 | GTGCGAAAGTTGGGGCAGATTTTGG                                 | DS4 delta fliF detect,<br>R, 250bp downstream       |
| BP609 | AATTGTTATCGACAAAAGCCGCTTACTG                              | DS4 delta fliS F1                                   |
| BP610 | gctaattcagtttaagcggccatGCAGCAGAAGTCGGCATT<br>TAATCG       | DS4 delta fliS R1,<br>universal overlap<br>homology |
| BP611 | atggccgcttaaactgaattagcCAAAGAACCGCGCATAGT<br>ATTCCTC      | DS4 delta fliS F2,<br>universal overlap<br>homology |
| BP612 | TCGAAGAGCCGTATTAAGATACTGACTAC                             | DS4 delta fliS R2                                   |
| BP613 | TTAATACTGAAGAAATCCTTCACTTGGTCG                            | DS4 delta fliS detect,<br>R, 250bp downstream       |
| BP614 | GCGCGGTTTTGACCATTGGC                                      | DS4 delta fliT F1                                   |
| BP615 | gctaattcagtttaagcggccatAAAGAGGAATACTATGCG<br>CGGTTCTTTG   | DS4 delta fliT R1,<br>universal overlap<br>homology |

|         |                                                          |                                                     |
|---------|----------------------------------------------------------|-----------------------------------------------------|
| BP616   | atggccgcttaaactgaattagcCTATTGGCCCAACGCGTT<br>CATCAG      | DS4 delta fliT F2,<br>universal overlap<br>homology |
| BP617   | ATCAACGGTCAAAGCGAAGATGTAAAAG                             | DS4 delta fliT R2                                   |
| BP618   | GCGGTAACACAGGTTTCGCGAAAC                                 | DS4 delta fliT detect,<br>R, 250bp downstream       |
| BP619   | AACGCGTTTCCGTTAGATCGGTGATC                               | DS4 delta fliD F1                                   |
| BP620   | gctaattcagtttaagcggccatGGCCAATAGATGAAAGAT<br>GCACTCATAG  | DS4 delta fliD R1,<br>universal overlap<br>homology |
| BP621   | atggccgcttaaactgaattagcGGGCCTAAACTCATCAA<br>TCACCTC      | DS4 delta fliD F2,<br>universal overlap<br>homology |
| BP622   | TTTGTCTTCAGGTTTCAAATCAACAGC                              | DS4 delta fliD R2                                   |
| BP623   | AAAATGGTTCGAGCAAATGAATGAATTTGTG                          | DS4 delta fliD detect,<br>R, 250bp downstream       |
| BP624   | TTTGCGCAATTGAGTGTTAGAAAGGG                               | DS4 delta flaG F1                                   |
| BP625   | gctaattcagtttaagcggccatCGGTTTGTTAGTTGAAAAG<br>GTGTAAGTCG | DS4 delta flaG R1,<br>universal overlap<br>homology |
| BP626   | atggccgcttaaactgaattagcTACAATCTCCCTTCCACC<br>TTATGAGC    | DS4 delta flaG F2,<br>universal overlap<br>homology |
| BP627   | AATGGTGAAGCAGCAGATCTTACAAC                               | DS4 delta flaG R2                                   |
| BP628   | CTAGACAACATTAACGAGAACGTGAACG                             | DS4 delta flaG detect,<br>R, 250bp downstream       |
| CAS0158 | GTGGCTGTTCGTAACGCGAAC                                    | F1 primer delta FlaE<br>(DSB67_RS03825)             |
| CAS0202 | GTTTCATCGCTGCAACCTATTCAGCTAATTCAGTT<br>TAAGCGGCCAT       | R1 for delta FlaE SOE<br>(DSB67_RS03825)            |
| CAS0160 | atggccgcttaaactgaattagcTGAATAGGTTGCAGCGAT<br>GAACATCG    | F2 primer delta FlaE<br>(DSB67_RS03825)             |
| CAS0161 | CGTAACCGTTCTACCAAGCTCTGG                                 | R2 primer delta FlaE<br>(DSB67_RS03825)             |
| CAS0162 | CGTAACTCTAACTTCGCAGAAGTG                                 | R delta FlaE detect<br>primer                       |
| CAS0163 | GGATGCCGAACATGGTGATCGTC                                  | F1 primer delta FlaF<br>(DSB67_RS11440)             |
| CAS0164 | gctaattcagtttaagcggccatCAGCATATCGGTTGCACT<br>GGTC        | R1 primer delta FlaF<br>(DSB67_RS11440)             |
| CAS0165 | atggccgcttaaactgaattagcCTTGTTAATGATTCGCA<br>CCACACG      | F2 primer delta FlaF<br>(DSB67_RS11440)             |
| CAS0166 | CCAGAGAATTCAACGTCACCTTCAAC                               | R2 primer delta FlaF<br>(DSB67_RS11440)             |
| CAS0189 | CCAAGTAGTTCTCTCAAAGTTAC                                  | R delta FlaF detect<br>primer                       |
| CAS0168 | CGGTACTTACGGTACTCAGTC                                    | F1 primer delta FlaA<br>(DSB67_RS11425)             |
| CAS0169 | gctaattcagtttaagcggccatCGCCATAGTTGATCTCCTT<br>AAGGC      | R1 primer delta FlaA<br>(DSB67_RS11425)             |

|         |                                                              |                                                                                      |
|---------|--------------------------------------------------------------|--------------------------------------------------------------------------------------|
| CAS0170 | atggccgcttaaactgaattagcGGCTAATTGGGTCGACTC<br>AGCC            | F2 primer delta FlaA<br>(DSB67_RS11425)                                              |
| CAS0171 | GAAGCAATGTCACCACCATCTTCC                                     | R2 primer delta FlaA<br>(DSB67_RS11425)                                              |
| CAS0172 | CGATTCTTCATCGACTCGAAACGC                                     | R delta FlaA detect<br>primer                                                        |
| CAS0192 | CGTGATTATGACGGTAGCGTGG                                       | F1 delta FlaB<br>(DSB67_03820)                                                       |
| CAS0193 | gctaattcagtttaagcggccatCACTGCCATGGTGATTTCT<br>CCAATTG        | R1 delta FlaB<br>(DSB67_03820)                                                       |
| CAS0194 | atggccgcttaaactgaattagcCTAGGTTAATAAACCTAA<br>TCGACGTG        | F2 delta FlaB<br>(DSB67_03820)                                                       |
| CAS0195 | CCTATTCATGGACCGTGATGCG                                       | R2 delta FlaB<br>(DSB67_03820)                                                       |
| CAS0196 | CACCAACATAATGCTGTCCTC                                        | delta FlaB detect<br>primer                                                          |
| CAS0197 | GGAGTGAGTAGAGACAGCGGTAG                                      | F1 delta FlaD<br>(DSB67_RS11430)                                                     |
| CAS0198 | gctaattcagtttaagcggccatCACTGCCATGGTGATTTCT<br>CC             | R1 delta FlaD<br>(DSB67_RS11430)                                                     |
| CAS0199 | atggccgcttaaactgaattagcCCTAACTCAGCGCTAAGT<br>CTTCTAGGT       | F2 delta FlaD<br>(DSB67_RS11430)                                                     |
| CAS0200 | TCACGTACGAATCGGTTAGCGTTC                                     | R2 delta FlaD<br>(DSB67_RS11430)                                                     |
| CAS0201 | CGCCATAGTTGATCTCCTTAAGGC                                     | delta FlaD detect<br>primer                                                          |
| BP090   | TGaattcccgggagagctcgatatcgcatGTGTGATAGCACA<br>ACCAAATACAT    | BB120 FliA polar<br>upstream homology, F,<br>homology to pRE112                      |
| BP091   | CAAAAGGGTCCTCTGTGAATTC                                       | BB120 FliA polar<br>upstream homology, R                                             |
| BP092   | ATCGTACTGAATTCACAGAGGACCCTTTTGACAC<br>ACTGATTTTAAGATTCAGTGG  | BB120 FliA polar<br>downstream homology,<br>F, homology to FliA<br>upstream homology |
| BP093   | CCCgatcccaagcttctctagaggtaccGATTCGGTCAGC<br>TGACCGCG         | BB120 FliA polar<br>downstream homology,<br>R, homology to<br>pRE112                 |
| BP094   | GTCACAGAGCGCTTCTTGAAT                                        | BB120 sequence<br>deletion of polar FliA                                             |
| BP095   | TCTCTGAGCAGCTTGATACCC                                        | BB120 check deletion<br>of FliA polar, F                                             |
| BP096   | GTCGTCGACTTCGTCCTGCG                                         | BB120 check deletion<br>of FliA polar, R                                             |
| BP104   | TGaattcccgggagagctcgatatcgcatGTAGAGAATCAAG<br>TAGAGCGTTATAAG | BB120 FlaM upstream<br>homology, F, homology<br>to pRE112                            |
| BP105   | TATGATTCTCCAGTATGTGCTTGC                                     | BB120 FlaM upstream<br>homology, R                                                   |

|       |                                                                 |                                                                                |
|-------|-----------------------------------------------------------------|--------------------------------------------------------------------------------|
| BP106 | GCGAGTGCAAGCACATACTGGAGAATCATATCT<br>CCACATCAATAGCCATAGGA       | BB120 FlaM<br>downstream homology,<br>F, homology to FlaM<br>upstream homology |
| BP107 | CCCgatcccaagcttctcttagaggtaccGAGAACACGCGCT<br>TTACGCAC          | BB120 FlaM<br>downstream homology,<br>R, homology to<br>pRE112                 |
| BP108 | CAGATAGATGTCTTTTTCCGCC                                          | BB120 sequence<br>deletion of FlaM                                             |
| BP109 | AAGTACAACCTTCAACGCTAGG                                          | BB120 check deletion<br>of FlaM, F                                             |
| BP111 | TGaattcccgaggagagctcgatatcgcatGGATGCACTCATA<br>GAAATTAGTGATATTG | BB120 FlaK upstream<br>homology, F, homology<br>to pRE112                      |
| BP112 | AAGTAAGAATGATTGCCTTTATTATGG                                     | BB120 FlaK upstream<br>homology, R                                             |
| BP113 | ACCCATAATAAAGGCAATCATTCTTACTTGGTC<br>ACCTTGGCGTTAAAGC           | BB120 FlaK<br>downstream homology,<br>F, homology to FlaM<br>upstream homology |
| BP114 | CCCgatcccaagcttctcttagaggtaccGTCCGCAATTCAC<br>CGTTCACA          | BB120 FlaK<br>downstream homology,<br>R, homology to<br>pRE112                 |
| BP115 | TTGTGCCAAATTGCATAGAAATGA                                        | BB120 sequence<br>deletion of FlrA                                             |
| BP116 | TCGCGAAACGCGTTGAAGAC                                            | BB120 check deletion<br>of FlrA, F                                             |
| AY001 | TGaattcccgaggagagctcgatatcgcatGCTTCTATGTCAG<br>GGAATTGTGATAAA   | BB120 LafK upstream<br>homology, F, homology<br>to pRE112                      |
| AY002 | TGAACCTTTACCTTCTCTTGTGG                                         | BB120 LafK upstream<br>homology, R                                             |
| AY003 | ACAACCCCAACAAGAGAAGGTAAAGGTTCAAAG<br>GAGAAAAGTAGATGGCAAGT       | BB120 LafK<br>downstream homology,<br>F, homology to LafK<br>upstream homology |
| AY004 | CCCgatcccaagcttctcttagaggtaccGTTAAGATCTTCG<br>CCCGGCTT          | BB120 LafK<br>downstream homology,<br>R, homology to<br>pRE112                 |
| AY005 | TTAAATGTATCTCGCCAGCGA                                           | BB120 sequence<br>deletion of lateral LafK                                     |
| AY006 | CCTAGCAACTCTACATCAAGCA                                          | BB120 check deletion<br>of LafK, F                                             |
| AY022 | GTCGTGAATATCGGTCCAGACAGG                                        | DS40M4, delta LafK F1                                                          |
| AY023 | gctaattcagtttaagcgccatCATTGAACCTTTACCTTCT<br>CTTGTTGGG          | DS40M4, delta LafK<br>R1, universal overlap<br>homology                        |



|                     |                                                         |                                                         |
|---------------------|---------------------------------------------------------|---------------------------------------------------------|
| AY024               | atggccgcttaaactgaattagcGCCTAAAAGGAGAAAAGT<br>AGATGGCAAG | DS40M4, delta LafK<br>F2, universal overlap<br>homology |
| AY025               | TACCACTGCACCACGCAGCT                                    | DS40M4, delta LafK<br>R2                                |
| AY026               | ATGAAAGGCTCGCTTTTTGGCTG                                 | DS40M4, detect delta<br>LafK Reverse                    |
| RC373               | cggtacctctagaagaagctt                                   | Amplify pRE112<br>backbone(universal)                   |
| RC374               | catgcgatatcgagctctcc                                    | Amplify pRE112<br>backbone(universal)                   |
| RC287               | GCGGCCTGAGTTTTTTAAGT                                    | Sequence pRE112-<br>upstream (universal)                |
| RC058               | aatgaattacaacagtactgcatg                                | Sequence pRE112-<br>downstream (universal)              |
| <b>qPCR Primers</b> |                                                         |                                                         |
| BP345               | ATGGCTAAGGGGCAATCTCTAC                                  | qRT-PCR DS40M4 Hfq<br>F                                 |
| BP346               | CTTGCAGTTTGATACCGTTCAC                                  | qRT-PCR DS40M4 Hfq<br>R                                 |
| BP330               | ATGGCGATTAACGTTAATACTAACGTTTC                           | qRT-PCR DS40M4<br>flaA F                                |
| BP331               | AAGACAAACGCTCCATTGATTTTTGTTG                            | qRT-PCR DS40M4<br>flaA R                                |
| BP358               | ATGAATGTGAATTTATCCAATGTTTCTG                            | qRT-PCR DS40M4 fliK<br>F                                |
| BP359               | AAAAACCTTTGCTTTCAGGGT                                   | qRT-PCR DS40M4 fliK<br>R                                |
| BP650               | ATGAAAAGATGGCTTGTTGCCG                                  | qRT-PCR DS40M4<br>flgO F                                |
| BP651               | ATTGGCTGCCTGAATACGGTTC                                  | qRT-PCR DS40M4<br>flgO R                                |
| BP673               | AGCACAACCAAATAACATGATTGCG                               | qRT-PCR DS40M4 flhF<br>F                                |
| BP674               | CTAGAGTCCTTCGCTGTCACTG                                  | qRT-PCR DS40M4 flhF<br>R                                |
| BP675               | TTTAGACTTTGCTAAGGAATTGCAGG                              | qRT-PCR DS40M4<br>flgB F                                |
| BP676               | GACCAAGGTTGTAGTGGCAGG                                   | qRT-PCR DS40M4<br>flgB R                                |

## References

1. Bassler BL, Greenberg EP, Stevens AM. 1997. Cross-species induction of luminescence in the quorum-sensing bacterium *Vibrio harveyi*. *J Bacteriol* 179:4043 LP – 4045.
2. Dias GM, Thompson CC, Fishman B, Naka H, Haygood MG, Crosa JH, Thompson FL. 2012. Genome sequence of the marine bacterium *Vibrio campbellii* DS40M4, isolated from open ocean water. *J Bacteriol* 194:904.
3. Simpson CA, Podicheti R, Rusch DB, Dalia AB, van Kessel JC. 2019. Diversity in Natural Transformation Frequencies and Regulation across *Vibrio* Species. *MBio* 10:1–16.
4. Tschirhart T, Shukla V, Kelly EE, Schultzhaus Z, NewRingeisen E, Erickson JS, Wang Z, Garcia W, Curl E, Egbert RG, Yeung E, Vora GJ. 2019. Synthetic Biology Tools for the Fast-Growing Marine Bacterium *Vibrio natriegens*. *ACS Synth Biol* 8:2069–2079.
5. Chaparian RR, Olney SG, Hustmyer CM, Rowe-Magnus DA, van Kessel JC. 2016. Integration host factor and LuxR synergistically bind DNA to coactivate quorum-sensing genes in *Vibrio harveyi*. *Mol Microbiol* 101:823–840.
6. Edwards RA, Keller LH, Schifferli DM. 1998. Improved allelic exchange vectors and their use to analyze 987P fimbria gene expression. *Gene* 207:149–157.
